# Supplementary material
Source: publisher figshare collection journal article supplement (https://gsapubs.figshare.com/articles/dataset/_/25655229)
Supplement: Supplementary file 1 [file 45761841]

Voldman, G.G., et al., 2024, First documentation of Late Paleozoic conodonts from Argentina: Biostratigraphic and paleoclimatic constraints for the Late Paleozoic Ice Age in SW Gondwana: *Geology*, <https://doi.org/10.1130/G52133.1>

## Supplemental Material

Conodont systematic paleontology.

## 1 SYSTEMATIC PALEONTOLOGY

2  
3 Genus *Neognathodus* Dunn, 1970

4 Type Species. *Polygnathus bassleri* Harris and Hollingsworth, 1933

5 *Remarks.* Many Early Pennsylvanian species of *Neognathodus* are poorly characterized and  
6 species ranges are not well constrained. A few names have been applied to wide variety of  
7 morphotypes often in an inconsistent manner. Through time, the shape and extent of the margins  
8 of the platforms of Early Pennsylvanian *Neognathodus* P<sub>1</sub> elements have varied from entire  
9 margins that enclose the platform to forms in which one or both margins have retreated from the  
10 dorsal tip and have assumed different shapes. The patterns of evolution and ancestor-descendent  
11 lineages are not well known.

12 The older species, *Neognathodus symmetricus* (Stibane) and *N. bassleri*, appear near the base of  
13 the Pennsylvanian and characterize Morrowan faunas. The P<sub>1</sub> elements possess high, entire  
14 margins that wrap around the dorsal tip of the element and a carina that lies close to the rostral  
15 platform margin. *Neognathodus symmetricus* has a long slender platform with nearly parallel  
16 margins, whereas in *N. bassleri* the ventral platform margin flare outward giving the platform a  
17 rounded triangular shape. The dorsal termination of the carina generally ends before reaching the  
18 dorsal margin, but may extend as a few nodes to near the dorsal margin or as a narrow ridge that  
19 joins the dorsal margin. The upper ranges of these two species are not well known because  
20 workers may have incorrectly assigned younger Pennsylvanian morphotypes with entire margins  
21 to these species.

22 In contrast, a series of early to middle Atokan species of *Neognathodus* have P<sub>1</sub> elements that  
23 possess a platform in which one or both margins have retreated from the dorsal tip of the element  
24 and the carina forms the dorsal tip: *N. nataliae*, *N. uralicus*, and *N. atokaensis*, and some  
25 unnamed morphotypes. *Neognathodus nataliae* Alekseev and Gerelzezeg and *N. atokaensis* have  
26 similar platform outlines, but in *N. nataliae* the more complete caudal platform margin is higher  
27 than the restricted rostral margin and in *N. atokaensis* the two margins are similar in height and  
28 the platform has a more heart shaped outline (Thompson and Lambert, 2017).

29 In late Atokan to early Desmoinesian strata, *Neognathodus* species in which the platform  
30 margins are reduced in size disappear and forms with entire margins reappear. *Neognathodus*  
31 *darcyae* Barrick and *N. bothrops* both have biconvex platform outlines (Barrick et al. 2023). In  
32 *N. darcyae* the carina does not reach the dorsal platform margin whereas in the slightly younger  
33 *N. bothrops* the carina does reach the dorsal platform margin. *Neognathodus colombiensis* has a  
34 distinctly triangular platform shape and a well-developed carina that extends to dorsal tip. In all  
35 of these species the outer edges of the wide platform margins slope gently down to the medial  
36 carina, unlike the deep adcarinal troughs formed by the steep margins of the older Morrowan  
37 species, *N. symmetricus* and *N. bassleri*, in which the carina also lies nearer to one side of the  
38 margin. Barrick et al. (2013, 2022) showed *N. colombiensis* as appearing in the latest Atokan,  
39 and *N. bothrops* appearing slight later, near the beginning of the Desmoinesian. According to  
40 Alekseev and Goreva (2013), *N. colombiensis* and *N. bothrops* originated simultaneously, with  
41 *N. atokaensis* as common ancestor. Moore (2017) considered that a morphotype called *N. "pre-*  
42 *colombiensis"* was most likely derived from *N. atokaensis* due to their similarity in platform  
43 shape, representing a transitional form between *N. atokaensis* and *N. colombiensis*. Wang and Qi  
44 (2022) illustrated a similar pattern of *Neognathodus* evolution based on material from South  
45 China.

46

47 *Neognathodus colombiensis* (Stibane, 1967)

48 Fig. 3: 1-5, 10, 13-14

49 1967. *Streptognathodus colombiensis* Stibane, p. 336, pl. 36, figs. 1-10.

50 1971. *Neognathodus* n. sp. A, Merrill and King, p. 659-660, pl. 76, fig. 7 (only).

51 2004. *Neognathodus colombiensis* Stibane, Barrick et al., pl. 1, fig. 1 (reillustrated in Barrick et  
52 al., 2013)

53 2017. *Neognathodus colombiensis* Stibane, Moore, p. 82-83, fig. 24: 13-17, 24, 25.

54 *Material*: 7 illustrated elements (CEGH-UNC 27639 to 27645)

55 *Description*: The P<sub>1</sub> element of *Neognathodus colombiensis* is characterized by a triangular,  
56 arrow-shaped outline with entire margins and a straight, medial carina that reaches the dorsal tip  
57 of the platform. It is sub-symmetrical, with the rostral margin slightly narrower and less  
58 prominent than the caudal margin. The surface of the platform is relatively flat, with shallow  
59 adcarinal troughs. The basal cavity is asymmetrical and extends anteriorly under the blade as a  
60 groove.

61 *Remarks*: *Neognathodus colombiensis* is similar to *N. bothrops*, but the latter has a more almond-  
62 shaped platform, the ventral adcarinal ridges are generally more developed, and the carina may  
63 be fused along much of its entire length. The distinctly triangular platform shape and wide  
64 ventral margins that slope gently into the shallow adcarinal troughs distinguish *N. colombiensis*  
65 from the Morrowan species, *N. asymmetricus* and *N. bassleri*.

66 The name *Neognathodus colombiensis* has been ignored, synonymized, or inconsistently applied  
67 to variety of different morphotypes. Stibane (1967) described *Neognathodus colombiensis* based  
68 on 18 specimens from two samples at Río Nevado, Santander Department, Colombia. Stibane  
69 and Forero (1969) interpreted this faunal assemblage to be likely Desmoinesian in age. Merrill  
70 and King (1971) considered the holotype (Stibane, 1967, pl. 36, figs. 1, 2) and one other  
71 specimen (figs. 9, 10) to be examples of *N. bassleri bassleri*, suggesting that the carina did not  
72 reach the posterior tip. They placed Stibane's other specimens into their *N. n. sp. A* apparently  
73 because in some specimens the carina more clearly reached the dorsal tip (figs. 6-8) or their *N. n.*  
74 *sp. B* because the carina appeared to be shifted to one side (figs. 3-5). Merrill (1972) proposed a  
75 series of new names for *Neognathodus* species, of which the new species *N. bothrops* was  
76 erected for Merrill and King's (1971) *N. sp. A*. The diagnosis of *N. bothrops* emphasized that the  
77 carina extended to the dorsal tip of the platform to distinguish it from *N. bassleri bassleri*, and  
78 the outline was called "lanceolate, with the greatest width in the anterior one-third" (Merrill,  
79 1972, p. 823). The holotype (OSU 28243) from the Lower Mercer of Ohio has a clearly ovate to  
80 biconvex outline, unlike the triangular shape of the holotype of *N. colombiensis*. Merrill (1972)  
81 retained the placement of the holotype of *N. colombiensis* in *N. bassleri bassleri*. Unlike Merrill  
82 and King (1971), our interpretation of the illustrations of Stibane (1967) is that the carina reaches  
83 the dorsal tip of the platform in the holotype and paratypes. Rabe (1977) assigned all of Stibane's  
84 material to *N. bassleri* n. subsp. A, which was based on Merrill and Kings (1971) *N. sp. A*.

85 Because Rabe had access to Stibane's material at Giessen, this species assignment supports the  
86 interpretation of the carina reaching the dorsal tip. This leaves two alternatives. One is that *N.*  
87 *colombiensis* and *N. bothrops* are the same species and the platform outline is not significant, in  
88 which case *N. colombiensis* is the appropriate name. Grayson (1984, p. 52) and Grubs (1984)  
89 synonymized *N. colombiensis* with *N. bothrops*, but for some unknown reason used the younger  
90 name *N. bothrops*. Lambert et al. (2001) pointed out that *N. colombiensis* has priority. We prefer  
91 the second alternative, that the outline of the platform is a species-diagnostic feature and that  
92 both names are valid. We recognize, though, that the diagnostic platform outlines are best seen in

93 larger specimens, and that small specimens cannot always be confidently assigned to one species  
94 or the other.  
95 Subsequent identifications of *Neognathodus* specimens as *N. colombiensis* have not always  
96 followed these criteria. A full synonymy will require reexamination of specimens reported as *N.*  
97 *colombiensis*, but we can make a few observations here. Good examples of *N. colombiensis* from  
98 the Seville Limestone were illustrated by Merrill and King (1971) and Barrick et al. (2004,  
99 2013). The illustrated specimens of Rabe (1977, pl. 1 figs. 28-30) from Bucaramanga, Santander  
100 Department, Colombia, possess a biconvex outline and are more likely examples of *N. bothrops*.  
101 Bender (1980) assigned three specimens from the Hare Fiord Formation, Arctic Canada, to *N.*  
102 *colombiensis*, but these species have incomplete platform margins and appear to be closer to *N.*  
103 *atokaensis*. The specimens identified as *N. colombiensis* in Cardoso et al. (2017, fig. 7: 10-12)  
104 appear to be examples of *N. "pre-colombiensis"* because the rostral platform margin is not  
105 complete (see below). Rojas Mantilla et al. (2022, fig. 3C) reillustrated a specimen from  
106 Nascimento et al. (2010) as *N. bassleri* that appears to be *N. colombiensis*. Some specimens  
107 shown as *N. bothrops* and *N. colombiensis* from South China (Wang and Qi, 2022, figs. 3-5)  
108 include shapes that are not typical of either species.

109  
110 *Neognathodus "pre-colombiensis"* Moore, 2017

111 Fig. 3: 6, 8-9

112 2017. *Neognathodus "pre-colombiensis"* Moore, p. 80-82, fig. 24: 13-17, 24, 25.

113 *Material*: 3 illustrated elements (CEGH-UNC 27646 to 27648)

114 *Description*: *Neognathodus "pre-colombiensis"* has a slightly asymmetrical triangular P<sub>1</sub>  
115 element with weak ridges and a medial carina that extends to the dorsal tip of the platform. The  
116 carina is straight, fused ventrally, and replaced by nodes dorsally. The rostral margin is narrow  
117 and extends as far ventrally than the caudal margin and is composed of nodes separated by gaps  
118 dorsally. The caudal margin is wider, continuous, and nodose where it meets the carina.

119 *Remarks*: The morphotype designated here as *Neognathodus "pre-colombiensis"* differs from *N.*  
120 *colombiensis* by a narrower rostral margin that is not continuous, but is composed of nodes and  
121 gaps dorsally. Moore (2017) suggested that this morphotype represented a transitional form from  
122 *N. atokaensis* to *N. colombiensis*, but included a couple of different morphotypes in this group.  
123 When Grayson (1984) erected *N. atokaensis* he included a wide variety of morphotypes that  
124 included basically all middle Atokan forms with restricted platform margins. He interpreted *N.*  
125 *atokaensis* to be a precursor species to his interpretation of *N. bothrops*. Unfortunately, two  
126 different specimens were listed by Grayson as being the holotype specimen OU10027 (pl. 1 fig.  
127 8; reillustrated as the holotype by Barrick et al., 2004; 2013) and specimen OU10051 (p. 52, pl. 3  
128 fig. 1). OU10027 could be considered to an example of *N. uralicus* Nemirovskaya and Alekseev  
129 1995, but we believe that OU10051 is the actual holotype. Three features characterize *N.*  
130 *atokaensis* as used by most workers: 1) the rostral and caudal margins lie at about the same  
131 height, 2) the ventral end of the rostral margin is shorter than the caudal margin, and 3) the dorsal  
132 end of the rostral margin is shorter than the carina and a distinct indentation lies between the end  
133 of the rostral margin and the end of the element. In the transition from *N. atokaensis* to *N.*  
134 *colombiensis*, the rostral margin lengthens ventrally to extend at least as far as the end of the  
135 caudal margin and the rostral margin lengthens dorsally to the dorsal end of the platform, losing  
136 the indentation. In the forms we call *N. "pre-colombiensis"*, both the ventral and rostral margins  
137 have reached the full extent of the platform and the dorsal rostral indentation is gone, but the  
138 dorsal rostral margin is incomplete with nodes separated by gaps.

139 Specimens in the transition from *N. atokaensis* to *N. colombiensis* have been commonly assigned  
140 incorrectly to *N. medadultrimus* Merrill 1972 (e.g., Grubbs, 1984, pl. 3 figs. 10-13; see discussion  
141 in Barrick et al., 2023) or included in *N. colombiensis* (e.g., Cardoso et al., 2017, fig. 7:10-12).  
142 Alekseev and Goreva (2013, fig. 4) illustrated a range of *Neognathodus* morphotypes,  
143 encompassing a succession of forms transitioning from *N. atokaensis* to *N. colombiensis*.  
144 Additional work is needed to better characterize the details of the *N. atokaensis* to *N.*  
145 *colombiensis* transition.

146  
147

## 148 REFERENCES CITED

149 Alekseev, A.S., and Goreva, N.V., 2013, The conodont *Neognathodus bothrops* Merrill, 1972 as  
150 the marker for the lower boundary of the Moscovian Stage (Middle Pennsylvanian). *Bulletin of*  
151 *the New Mexico Museum of Natural History and Science*, v. 60, p. 1–6.

152 Barrick, J.E., Alekseev, A.S., Blanco-Ferrera, S., Goreva, N.V., Hu, K., Lambert, L.L.,  
153 Nemyrovska, T.I., Qi, Y., Ritter, S.M., and Sanz-López, J., 2022, Carboniferous conodont  
154 biostratigraphy, *in* Lucas, S.G., Schneider, J.W., Wang, X., and Nikolaeva, S., eds., *The*  
155 *Carboniferous Timescale: Geological Society, London, Special Publications 512*, p. 695–768,  
156 <https://doi.org/10.1144/SP512-2020-38>.

157 Barrick, J.E., Lambert, L.L., Heckel, P.H., and Boardman, D.R., 2004, Pennsylvanian conodont  
158 zonation for Midcontinent North America. *Revista Española de Micropaleontología*, v. 36, p.  
159 231–250.

160 Barrick, J.E., Lambert, L.L., Heckel, P.H., Rosscoe, S.J., and Boardman, D.R., 2013,  
161 *Midcontinent Pennsylvanian conodont zonation: Stratigraphy*, v. 10, p. 55–72.

162 Barrick, J.E., Nestell, K.M., and Wahlman, G.P., 2023, Conodont and fusulinid faunas across the  
163 Atokan-Desmoinesian boundary (Middle Pennsylvanian), upper part of the Sandia Formation  
164 and lower part of the Porvenir Formation, southern Sangre De Cristo Mountains, Northern New  
165 Mexico, U.S.A. *New Mexico Museum of Natural History and Science Bulletin*, v. 94, p. 1–47.

166 Bender, K.P., 1980, Lower and Middle Pennsylvanian conodonts from the Canadian Arctic  
167 Archipelago: *Geological Survey of Canada, Paper 79-15*, 29 p.

168 Cardoso, C.N., Sanz-López, J., and Blanco-Ferrera, S., 2017, Pennsylvanian conodonts from the  
169 Tapajós Group (Amazonas Basin, Brazil). *Geobios*, v. 50, p. 75–95,  
170 <http://dx.doi.org/10.1016/j.geobios.2017.02.004>.

171 Dunn, D.L., 1970, Middle Carboniferous conodonts from western United States and phylogeny  
172 of the platform genera. *Journal of Paleontology*, v. 44, p. 312–342.

173 Grayson, R.C.Jr., 1984, Morrowan and Atokan (Pennsylvanian) conodonts from the eastern  
174 margin of the Arbuckle Mountains, southern Oklahoma, *in* Sutherland, P.K., and Manger, W.L.,  
175 eds., *The Atokan Series (Pennsylvanian) and its boundaries – a symposium: Oklahoma*  
176 *Geological Survey Bulletin 136*, p. 41–61.

- 177 Grubbs, R.K., 1984, Conodont platform elements from the Wapanucka and Atoka Formation  
178 (Morrowan–Atokan) of the Mill Creek Syncline, Central Arbuckle Mountains, Oklahoma, *in*  
179 Sutherland, P.K., and Manger, W.L., eds., *The Atokan Series (Pennsylvanian) and its boundaries*  
180 – a symposium: Oklahoma Geological Survey Bulletin 136, p. 65–80.
- 181 Harris, R.W., and Hollingsworth, R.V., 1933, New Pennsylvanian Conodonts from Oklahoma.  
182 *American Journal of Science*, v. 5, p. 193–204.
- 183 Lambert, L.L., Barrick, J.E., and Heckel, P.H., 2001, Provisional Lower and Middle  
184 Pennsylvanian conodont zonation in Midcontinent North America. I.U.G.S. Subcommission on  
185 Carboniferous Stratigraphy, *Newsletter on Carboniferous Stratigraphy*, v. 19, p. 50–55.
- 186 Merrill, G.K., and King, C.W., 1971, Platform Conodonts from the Lowest Pennsylvanian Rocks  
187 of Northwestern Illinois. *Journal of Paleontology*, v. 45, p. 645–664.
- 188 Merrill, G.K., 1972, Taxonomy, phylogeny, and biostratigraphy of *Neognathodus* in  
189 Appalachian Pennsylvanian rocks. *Journal of Paleontology*, v. 46, p. 817–829.
- 190 Moore, P.A., 2017, Conodont biostratigraphy of the Middle Pennsylvanian Sandia Formation  
191 and lower Gray Mesa Formation in north-central New Mexico [M.S. thesis]: Lubbock, Texas  
192 Tech University, 109 p.
- 193 Nascimento, S., Scomazzon, A.K., Lemos, V.B., Moutinho, L.P., and Matsuda, N.S., 2010,  
194 Bioestratigrafia e paleoecologia com base em conodontes em uma seção de carbonatos marinhos  
195 do Pensilvaniano inferior, Formação Itaituba, borda sul da Bacia do Amazonas, Brasil. *Pesquisas*  
196 *em Geociências*, v. 37, p. 243–256.
- 197 Nemirovskaya T.I., and Alekseev A.S., 1995, The Bashkirian conodonts of the Askyn section.  
198 Bashkirian mountains, Russia. *Bulletin de la Société de Géologie*, v. 103, p. 109–133.
- 199 Rabe, E.H., 1977, Zur Stratigraphie des ostandinischen Raumes von Kolumbien: I. Die Abfolge  
200 Devon bis Jura der Ostkordillere Nördlich von Bucaramanga; II. Conodonten des jüngeren  
201 Paläozoikum der Ostkordillere, Sierra Nevada de Santa Marta und der Serranía de Perijá.  
202 *Giessener Geologische Schriften*, v. 11, p. 1–95.
- 203 Rojas Mantilla, A.F., Scomazzon, A.K., Nascimento, S., dos Santos Alvarenga, R., Brasil  
204 Lemos, V., and Alves de Souza, P., 2022, The conodont genus *Neognathodus* Dunn, 1970, lower  
205 to middle Pennsylvanian, Amazonas Basin, Western Gondwana: Biostratigraphic and  
206 paleoenvironmental analysis. *Geobios*, v. 75, p. 17–40,  
207 <https://doi.org/10.1016/j.geobios.2022.10.002>.
- 208 Stibane, F.R., 1967, Conodonten des Karbons aus den nördlichen Anden Südamerikas. *Neues*  
209 *Jahrbuch für Geologie und Paläontologie*, v. 128, p. 329–340.
- 210 Stibane, F.R., and Forero, A., 1969, Los afloramientos del Paleozoico de La Jagua (Huila) y Río  
211 Nevado (Santander del Sur). *Geología Colombiana*, v. 6, p. 31–66.

212 Thompson, T.L., and Lambert, L.L., 2017, Atokan (Middle Pennsylvanian) conodonts from  
213 laterally restricted pre-Cherokee units of southwestern Missouri, *in* Barrick, J.E., and Brenckle,  
214 P.L., eds., Papers in celebration of H. Richard Lane: Stratigraphy, v. 14, p. 377–389,  
215 <https://doi.org/10.29041/strat.14.1-4.377-389>.

216 Wang, Q.-l, and Qi, Y-p., 2022, The Pennsylvanian conodont genus *Neognathodus* from  
217 southern Guizhou, South China: evolution and its stratigraphic significance. *Acta*  
218 *Palaeontologica Sinica*, v. 61, p. 458–471, <https://doi.org/10.19800/j.cnki.aps.2022047>.
